# Supplementary material for: Development of Chrysin Loaded Oil-in-Water Nanoemulsion for Improving Bioaccessibility
Source: MDPI journal article supplement (doi:10.3390/foods10081912), 2021-08-18

# Supplementary materials

## Development of Chrysin Loaded Oil-in-Water Nanoemulsion for Improving Bioaccessibility

Pisamai Ting <sup>1</sup>, Wanwisa Srinuanchai <sup>2</sup>, Uthaiwan Suttisansanee <sup>3</sup>, Siriporn Tuntipopipat <sup>3</sup>, Somsri Charoenkiatkul <sup>3</sup>, Kemika Praengam <sup>3</sup>, Boonrat Chantong <sup>4</sup>, Piya Temviriyanyukul <sup>3,\*</sup>,† and Onanong Nuchuchua <sup>2,\*</sup>,†

<sup>1</sup> Doctoral Program in Nutrition, Faculty of Medicine Ramathibodi Hospital and Institute of Nutrition, Mahidol University, Bangkok 10400, Thailand

<sup>2</sup> Nano Agricultural Chemistry and Processing Research Team, National Nanotechnology Center (NANOTEC), National Science and Technology Development Agency (NSTDA), Klong Luang, Pathum Thani 12120, Thailand

<sup>3</sup> Institute of Nutrition, Mahidol University, Salaya, Phuttamonthon, Nakhon Pathom 73170, Thailand

<sup>4</sup> Department of Pre-Clinical and Applied Animal Science, Faculty of Veterinary Science, Mahidol University, Salaya, Phutthamonthon, Nakhon Pathom 73170

\* Correspondence: piya.tem@mahidol.ac.th (P.T.); onanong@nanotec.or.th (O.N.); Tel.: +66-2800-2380 (ext. 326) (P.T.); +66-2117-6792 (O.N.)

† These authors contributed equally to this work.

## Supplementary Table S1:

The validation parameters of chrysin detection using HPLC technique.

| Linear range<br>(µg/mL) | Linear regression<br>equation | Correlation<br>coefficient<br>(R <sup>2</sup> ) | LOD<br>(µg/mL) | LOQ<br>(µg/mL) | %RSD     |          |          |          |          |          |
|-------------------------|-------------------------------|-------------------------------------------------|----------------|----------------|----------|----------|----------|----------|----------|----------|
|                         |                               |                                                 |                |                | Intraday |          |          | Interday |          |          |
|                         |                               |                                                 |                |                | 1 µg/mL  | 10 µg/mL | 25 µg/mL | 1 µg/mL  | 10 µg/mL | 25 µg/mL |
| 1-25                    | y = 345036x-<br>49719         | 0.9999                                          | 0.0307         | 0.1023         | 0.88     | 1.15     | 1.76     | 15.78    | 7.86     | 5.53     |

## Supplementary Figure S1:

High performance liquid chromatograms of (A.) chrysin, and (B.) chrysin in nanoemulsion (NE1)

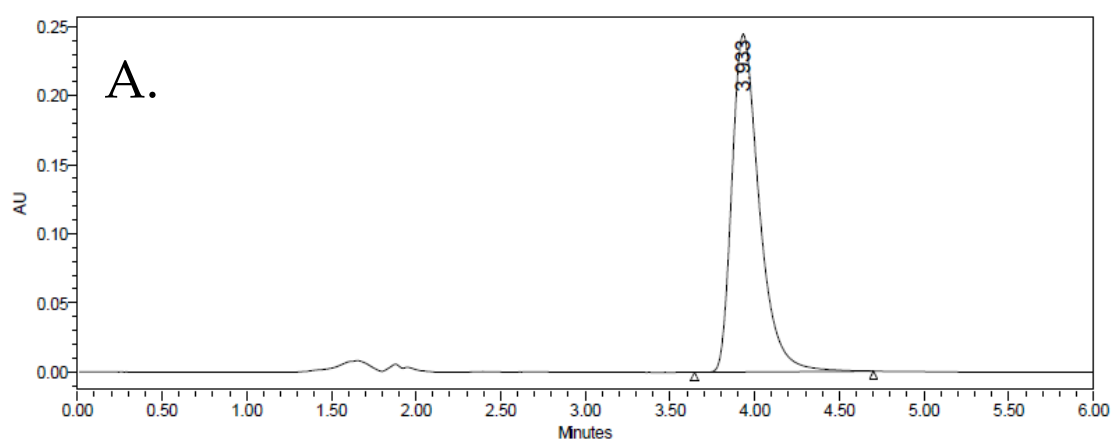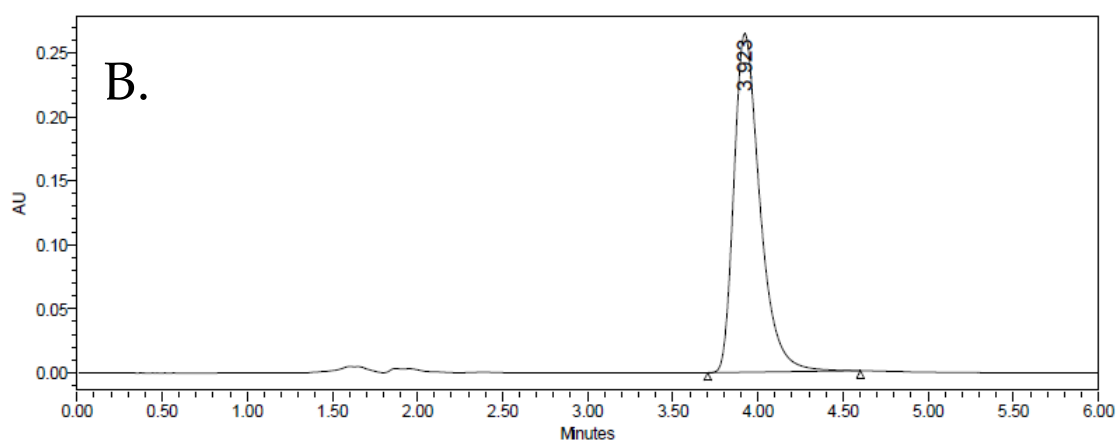

## Supplementary Figure S2:

Mass spectra of deprotonated molecular ion of (A.) chrysin, (B.) chrysin in the gastric phase, (C.) intestinal phase, (D.) apical side of Caco-2 cells, (E.) intracellular of Caco-2 cells, and (F.) basolateral side of Caco-2 cells.

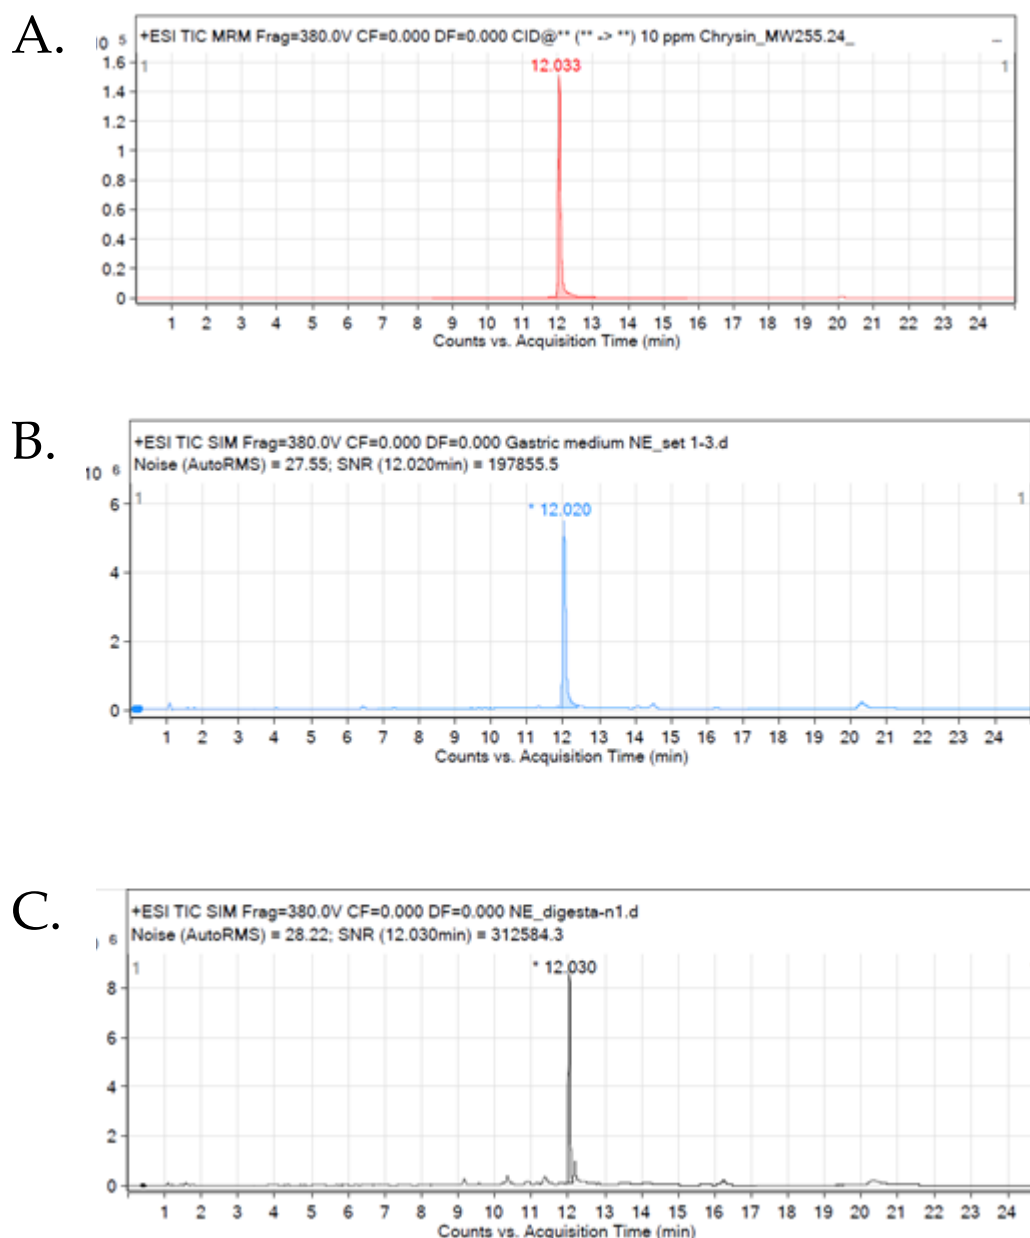

## Supplementary Figure S2 (Cont.):

Mass spectra of deprotonated molecular ion of (A.) chrysin, (B.) chrysin in the gastric phase, (C.) intestinal phase, (D.) apical side of Caco-2 cells, (E.) intracellular of Caco-2 cells, and (F.) basolateral side of Caco-2 cells.

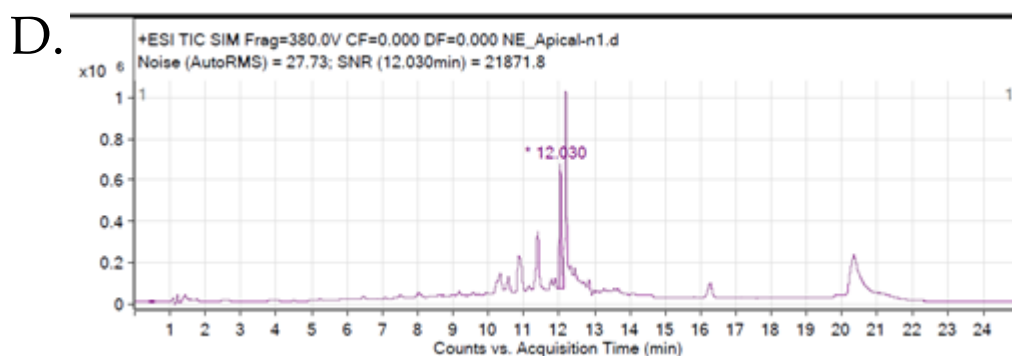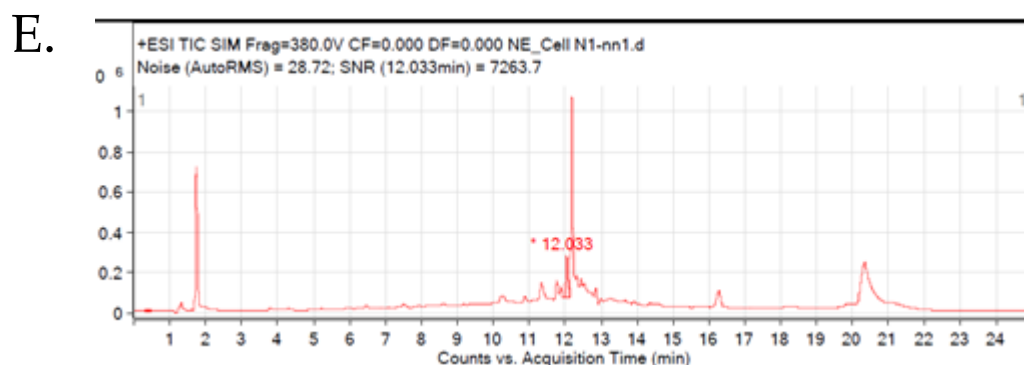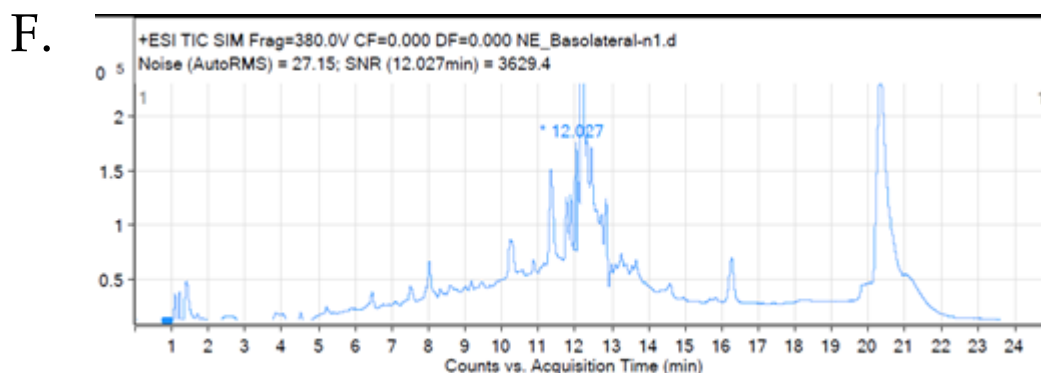

Supplement: s1 [file s1]
